# Supplementary material for: RETRACTED: Thymoquinone and Curcumin Defeat Aging-Associated Oxidative Alterations Induced by D-Galactose in Rats’ Brain and Heart
Source: MDPI journal article supplement (doi:10.3390/ijms22136839), 2021-06-25
Supplement: s1 [file s1]

## Supplementary Files

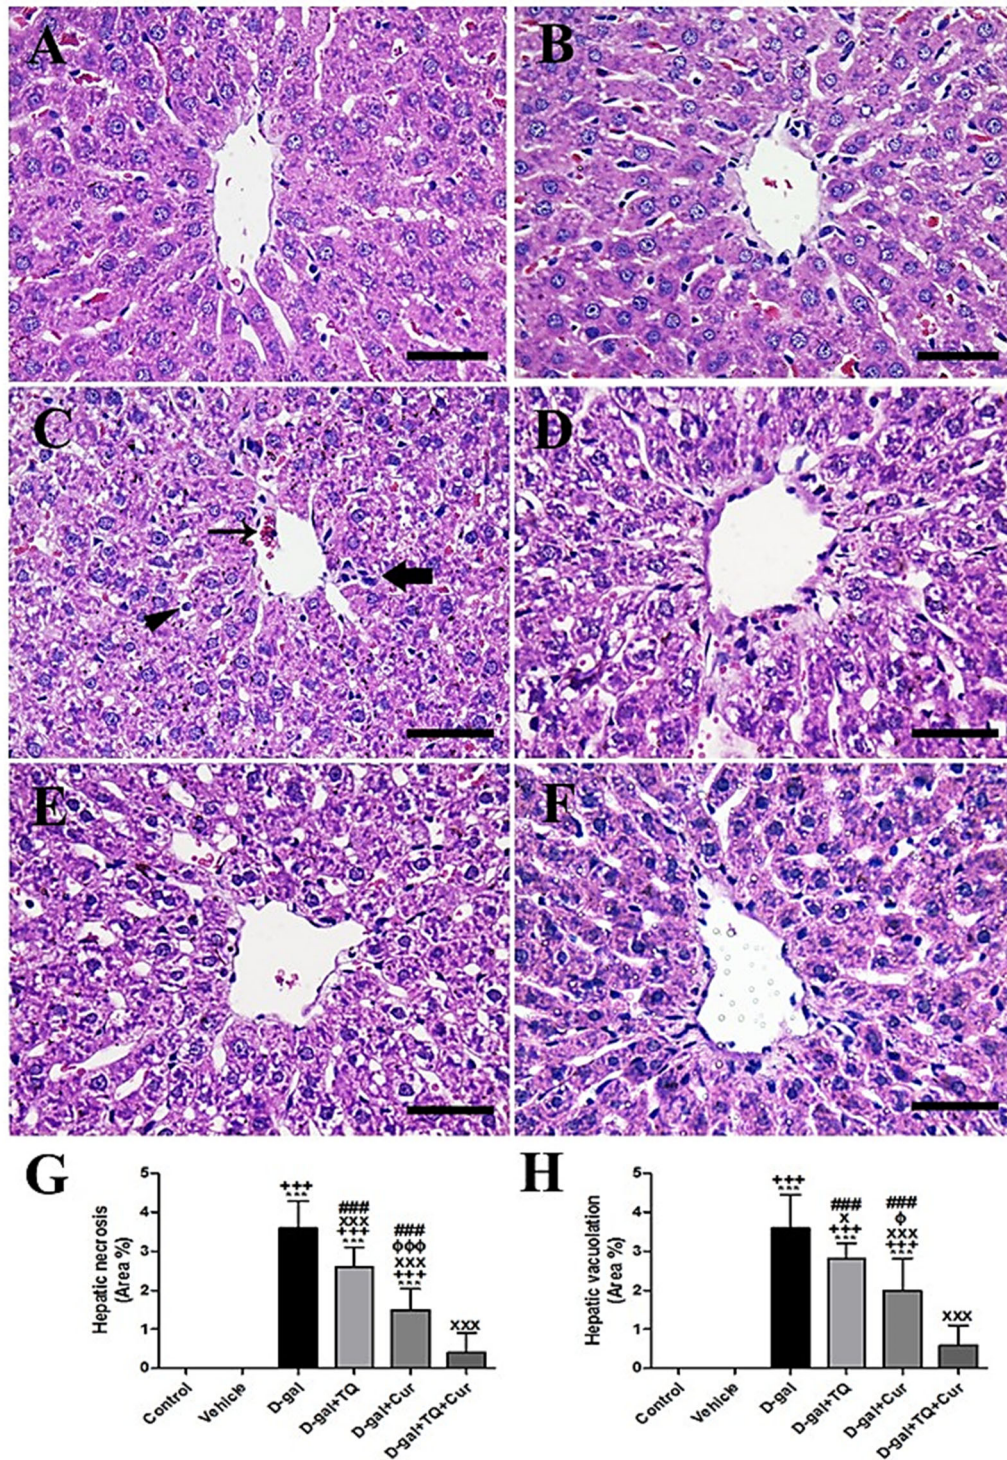

**Figure S1.** Histopathological examination of rat liver. **A)** negative control. **B)** vehicle group. **C)** D-gal group revealing necrosis of hepatocytes (arrowhead), wide congested central vein (thin arrow) and lymphocytic infiltrations (thick arrow). **D)** D-gal+TQ group. **E)** D-gal+Cur group. **F)** D-gal+TQ+Cur group. **G)** H&E semiquantitative scoring of hepatic necrosis **H)** H&E semiquantitative scoring of hepatic vacuolations. Scale bar = 50  $\mu$ m. Data were analyzed with one-way ANOVA, followed by Tukey's multiple comparison test. \*\*\*  $p < 0.001$  vs. control. +++  $p < 0.001$  vs. vehicle. \*  $p < 0.05$

and  $^{xxx}p < 0.001$  vs. D-gal.  $^{\phi}p < 0.05$  and  $^{\phi\phi\phi}p < 0.001$  vs. D-gal+TQ.  $^{***}p < 0.001$  vs. D-gal+TQ+Cur. Error bars represent mean  $\pm$  SD.  $n = 10$ .

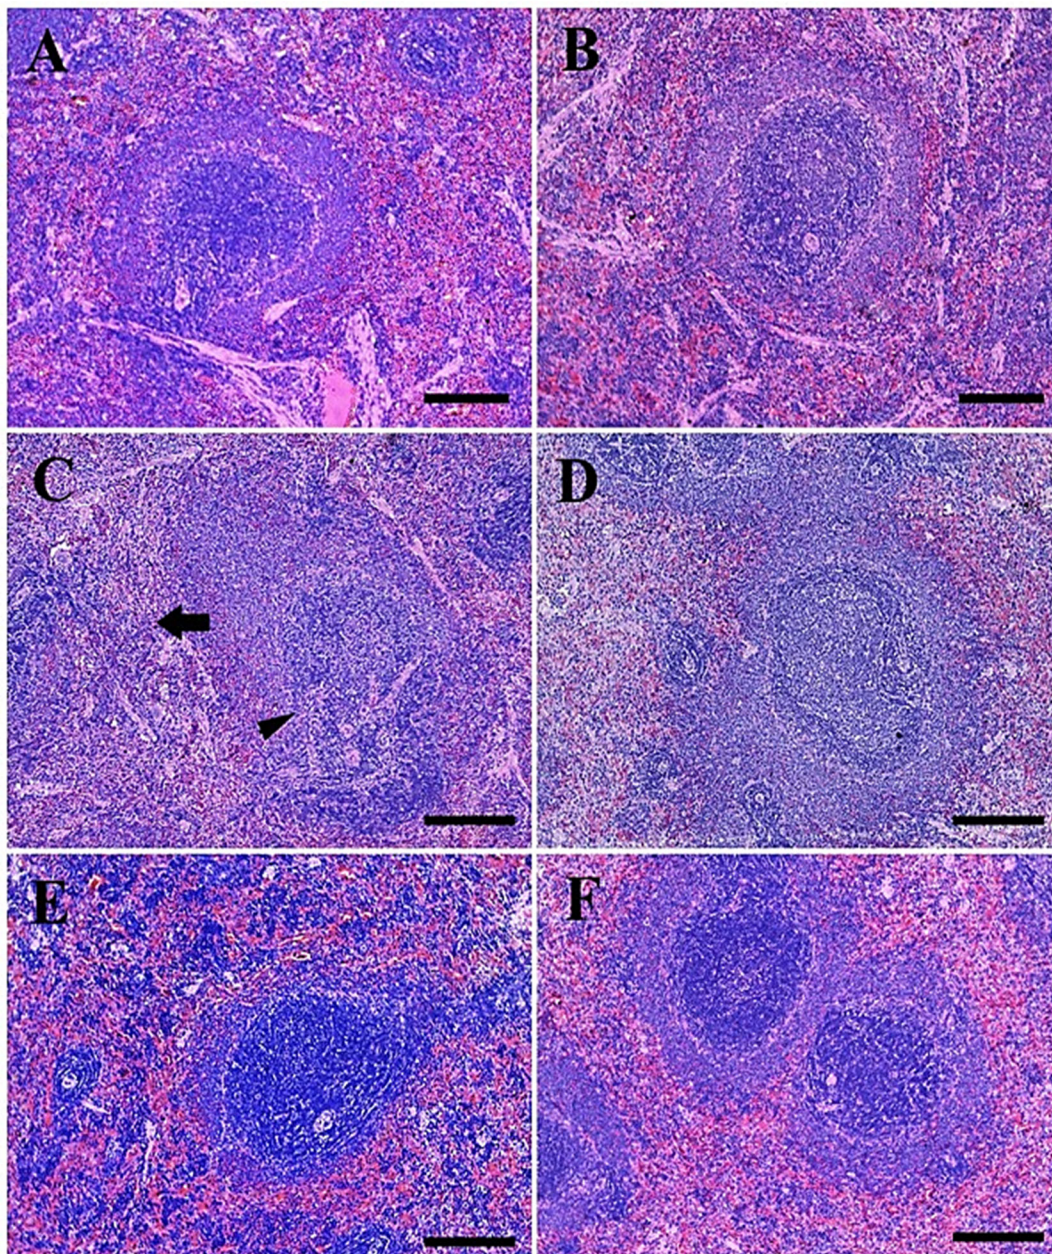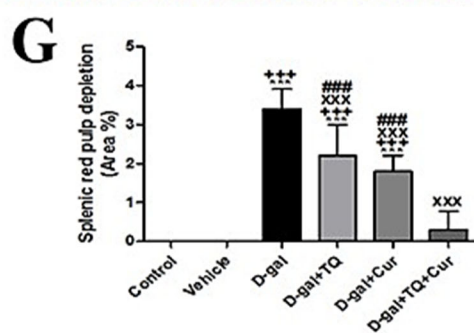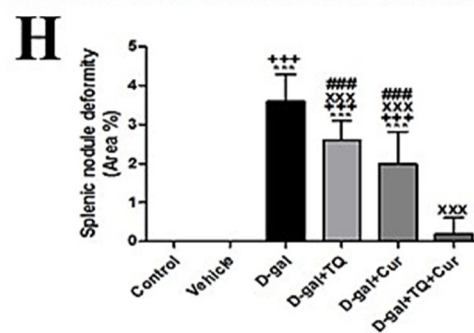

**Figure S2.** Histopathological examination of the rat spleen. **A)** negative control group. **B)** vehicle group. **C)** D-gal group revealing the depletion of the red pulp (arrow) and deformities in lymphoid nodule (arrowhead). **D)** D-gal+TQ group. **E)** D-gal+Cur group. **F)** D-gal+TQ+Cur group. **G)** H&E semi-quantitative scoring of splenic red pulp depletion. **H)** H&E semi-quantitative scoring of splenic nodules deformity. Scale bar =200  $\mu$ m. Data were analyzed with one-way ANOVA, followed by Tukey's multiple comparison test. \*\*\*  $p < 0.001$  vs. control. +++  $p < 0.001$  vs. vehicle. xxx  $p < 0.001$  vs. D-gal. ###  $p < 0.001$  vs. D-gal+TQ+Cur. Error bars represent mean  $\pm$  SD.  $n=10$ .

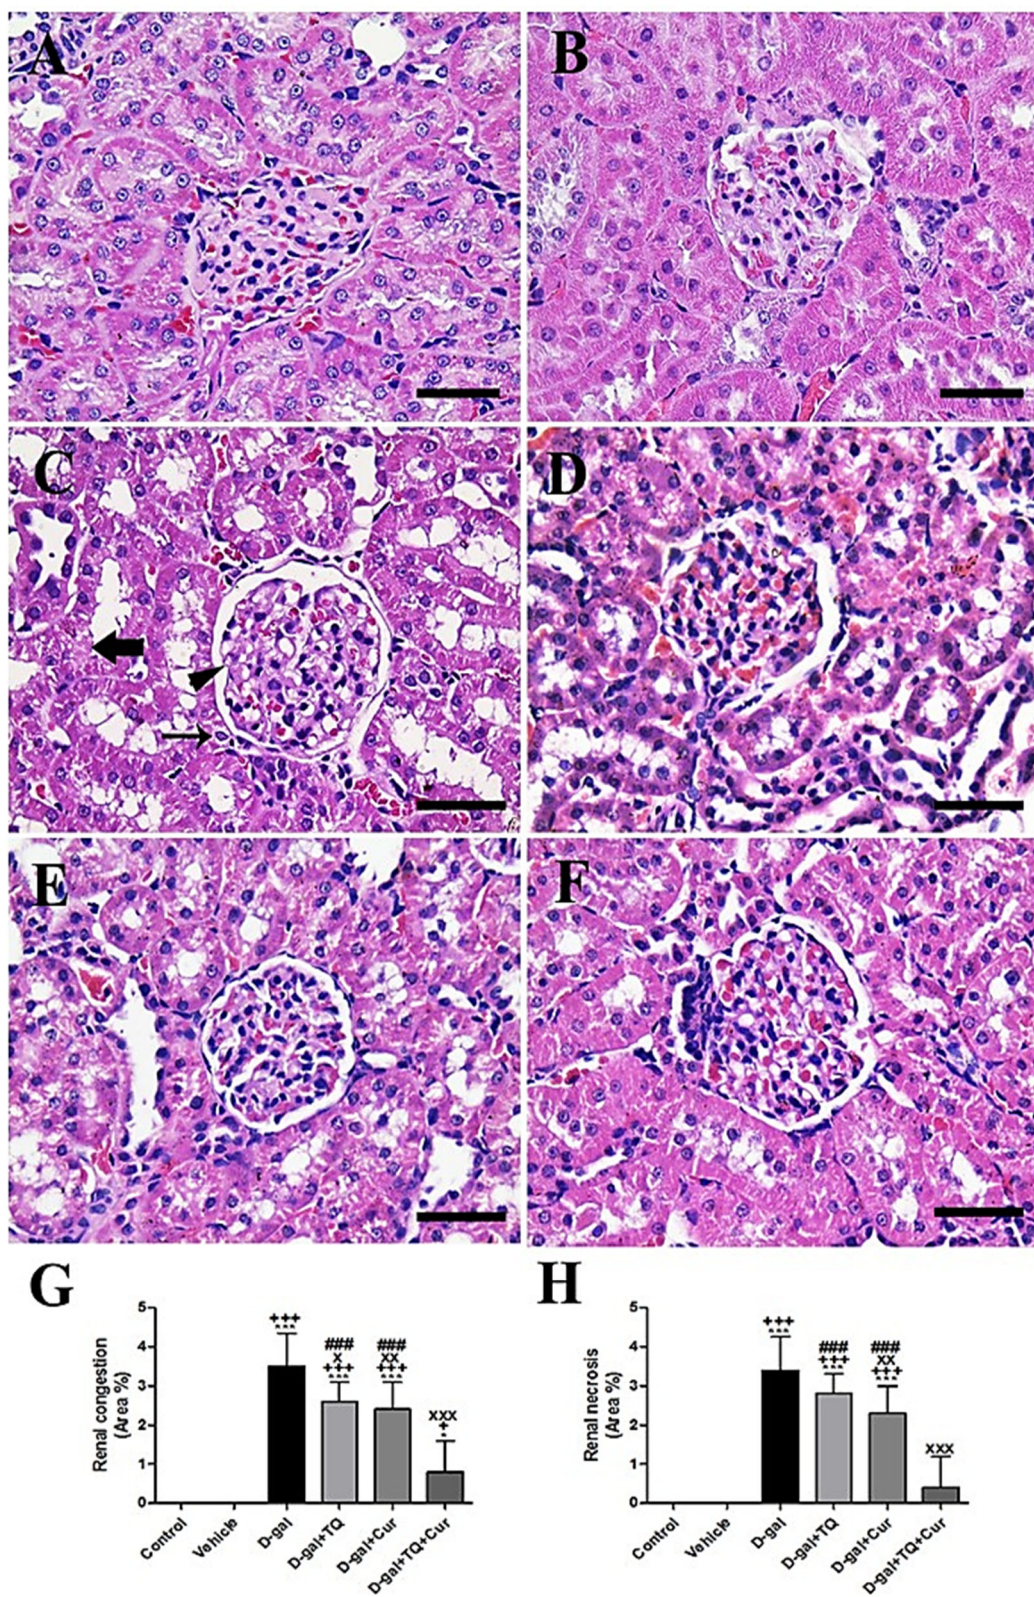

**Figure S3.** Histopathological examination of rat kidney. **A)** negative control group. **B)** vehicle group. **C)** D-gal group revealing the revealing congestion (arrowhead), degeneration in the renal tubules (thin arrow) and intratubular eosinophilic proteinaceous materials inside the lumen of renal tubules (thick arrow). **D)** D-gal+TQ group. **E)** D-gal+Cur

group. **F)** D-gal+TQ+Cur group. **G)** H&E semiquantitative scoring of renal congestion. **H)** H&E semiquantitative scoring of renal necrosis. Scale bar =50  $\mu$ m. \*  $p < 0.05$  and \*\*\*  $p < 0.001$  vs. control. \*  $p < 0.05$  and \*\*\*  $p < 0.001$  vs. vehicle.  $^x p < 0.05$ ,  $^{xx} p < 0.01$ , and  $^{xxx} p < 0.001$  vs. D-gal. \*\*\*  $p < 0.001$  vs. D-gal+TQ+Cur. Error bars represent mean  $\pm$  SD.  $n = 10$ .

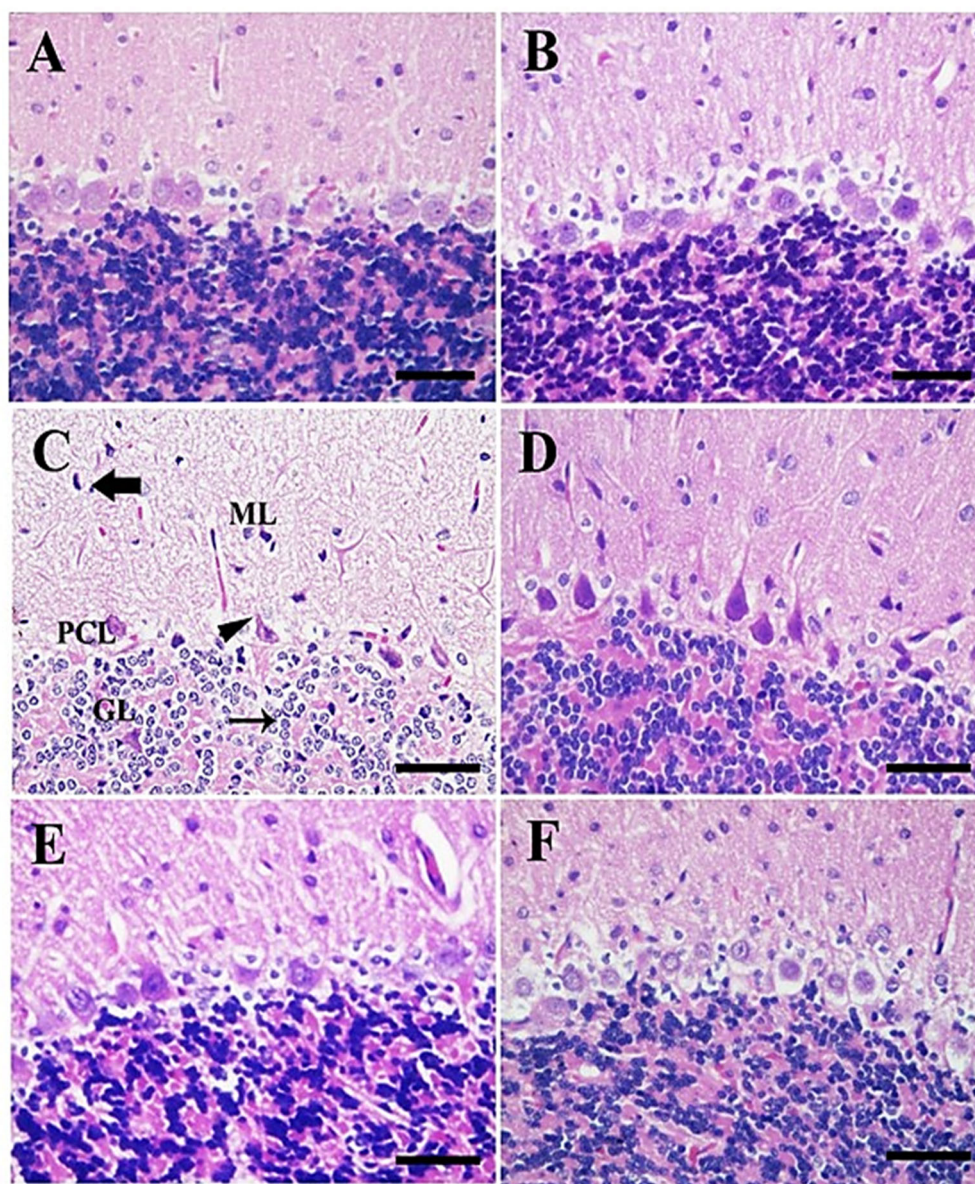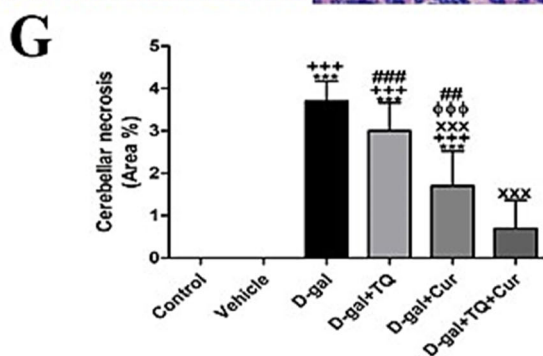

**Figure S4.** Histopathological examination of rat cerebellum. **(A)** negative control. **(B)** vehicle group. **(C)** D-gal group revealing necrosis of Purkinje cells (arrowhead) in Purkinje cells layer (PCL), neurons (thin arrow) in granular layer (GL) and neurons (thick arrow) in molecular layer (ML). **(D)** D-gal+TQ group. **(E)** D-gal+Cur group. **(F)** D-gal+TQ+Cur group. **(G)** H&E semiquantitative scoring of cerebellar necrosis. Scale bar= 50  $\mu$ m. Data were analyzed with one-way ANOVA, followed by Tukey's multiple comparison test. \*\*\*  $p < 0.001$  vs. control. +++  $p < 0.001$  vs. vehicle. xxx  $p < 0.001$  vs. D-gal.  $\phi\phi\phi$   $p < 0.001$  vs. D-gal+TQ.  $\#\#$   $p < 0.01$  and  $\#\#\#$   $p < 0.001$  vs. D-gal+TQ+Cur. Error bars represent mean  $\pm$  SD.  $n = 10$ .

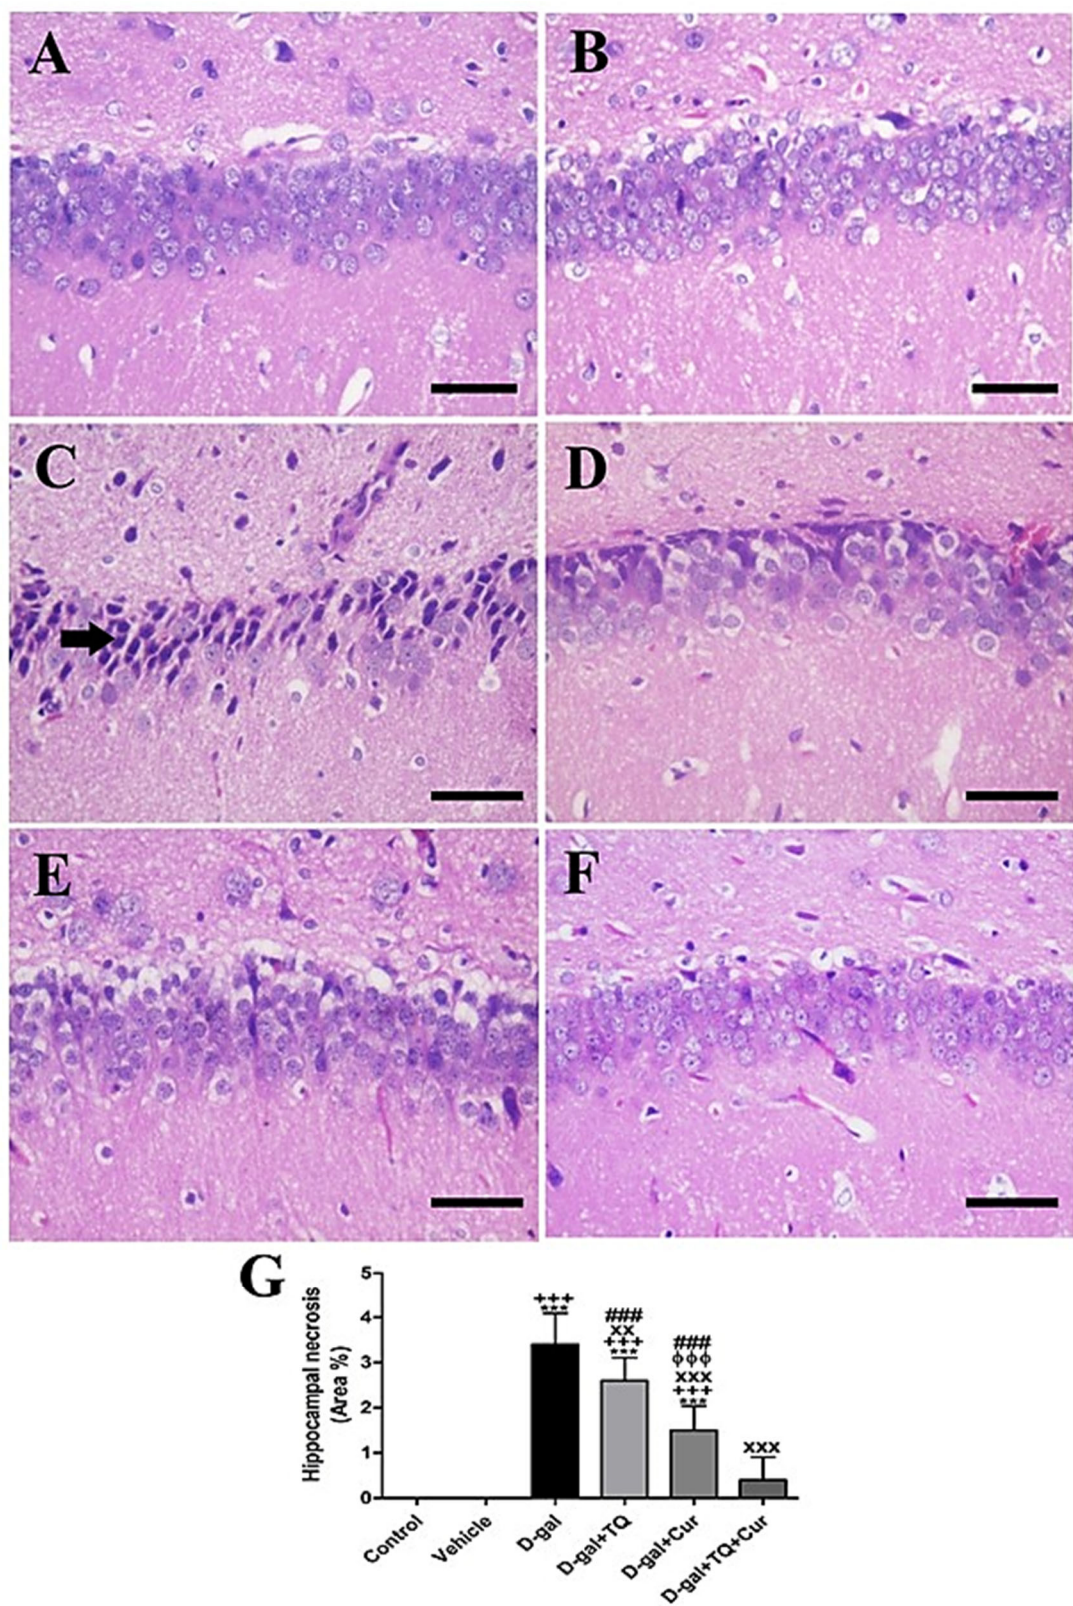

**Figure S5.** Histopathological examination of rat hippocampus. (A) negative control group. (B) vehicle group. (C) D-gal group revealing the necrosis of dentate gyrus neurons. Layers and numbers of hippocampal cells were decreased with enlarged intercellular space and disordered cells; especially, some cells exhibited shrink in volume, with pyknosis or

rupture in nuclei (arrow). **(D)** D-gal+TQ group. **(E)** D-gal+Cur group. **(F)** D-gal+TQ+Cur group. **(G)** H&E semi-quantitative scoring of cerebellar necrosis. Scale bar= 50  $\mu$ m. Data were analyzed with one-way ANOVA, followed by Tukey's multiple comparison test. \*\*\*  $p < 0.001$  vs. control. ++  $p < 0.001$  vs. vehicle.  $^{xx}p < 0.01$  and  $^{xxx}p < 0.001$  vs. D-gal.  $^{\phi\phi\phi}p < 0.001$  vs. D-gal+TQ.  $^{##}p < 0.001$  vs. D-gal+TQ+Cur. Error bars represent mean  $\pm$  SD.  $n= 10$ .

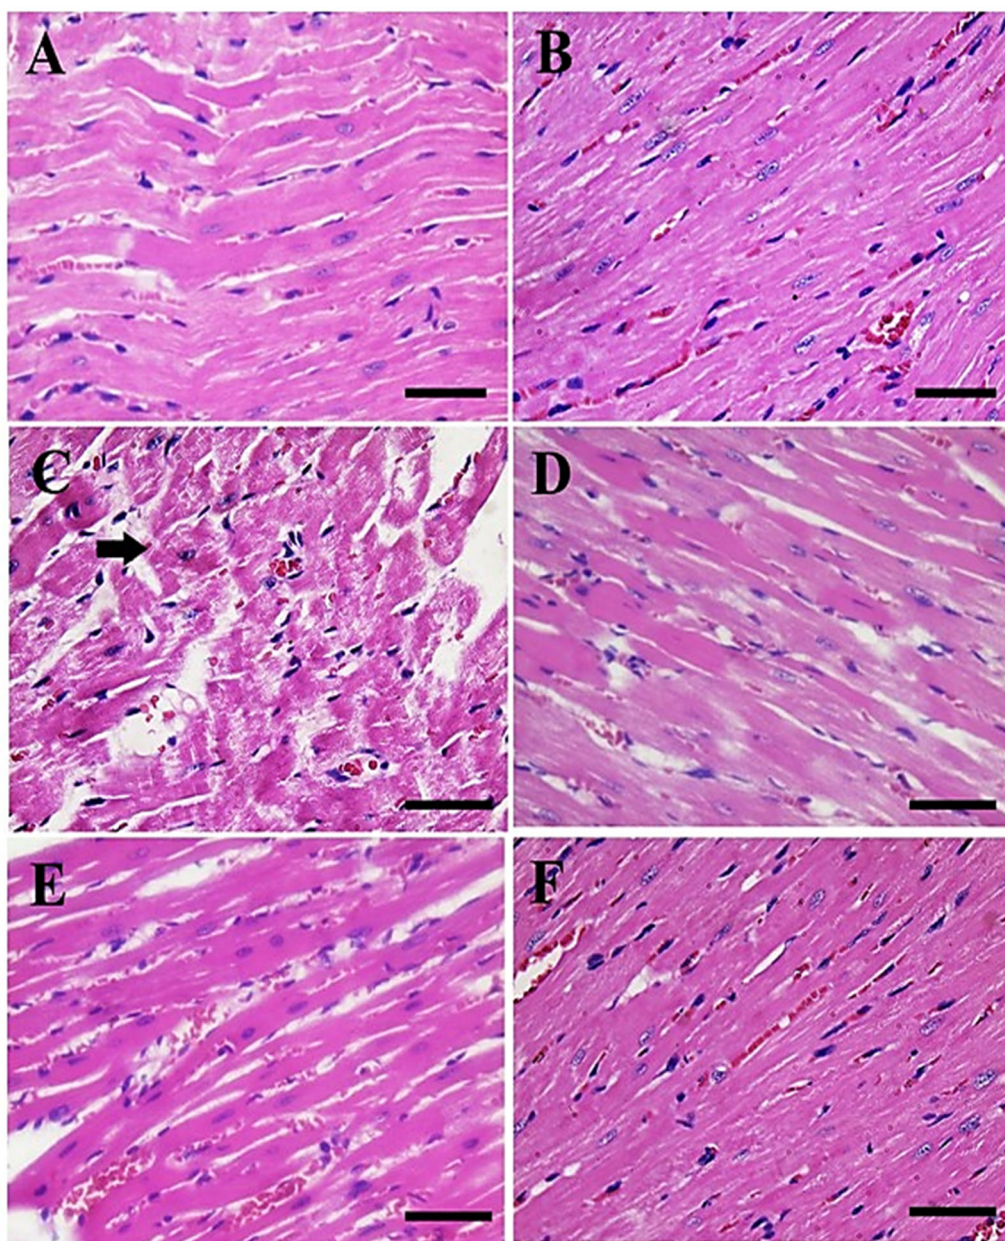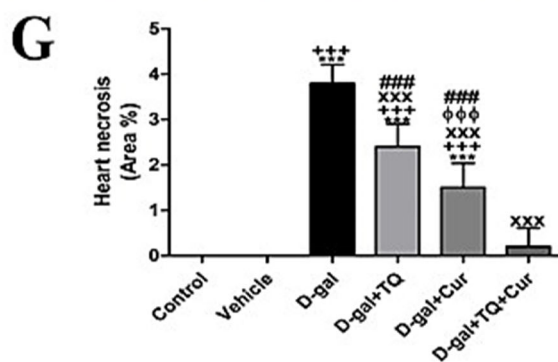

**Figure S6.** Histopathological examination of rat heart. (A) negative control group. (B) vehicle group. (C) D-gal revealing the disarrayed necrotic myofibers (arrow). (D) D-gal+TQ group. (E) D-gal+Cur group. (F) D-gal+TQ+Cur

group. **(G)** H&E semiquantitative scoring of cardiac necrosis. Scale bar= 50  $\mu\text{m}$ . Data were analyzed with one-way ANOVA, followed by Tukey's multiple comparison test. \*\*\* $p < 0.001$  vs. control. +++ $p < 0.001$  vs. vehicle. xxx $p < 0.001$  vs. D-gal.  $\phi\phi\phi p < 0.001$  vs. D-gal+TQ.  $^{***}p < 0.001$  vs. D-gal+TQ+Cur. Error bars represent mean  $\pm$  SD.  $n = 10$ .
